# Supplementary material for: Ethylene Induced by Sound Stimulation Enhances Anthocyanin Accumulation in Grape Berry Skin through Direct Upregulation of UDP-Glucose: Flavonoid 3-O-Glucosyltransferase
Source: MDPI journal article supplement (doi:10.3390/cells10102799), 2021-10-19
Supplement: s1 [file s1]

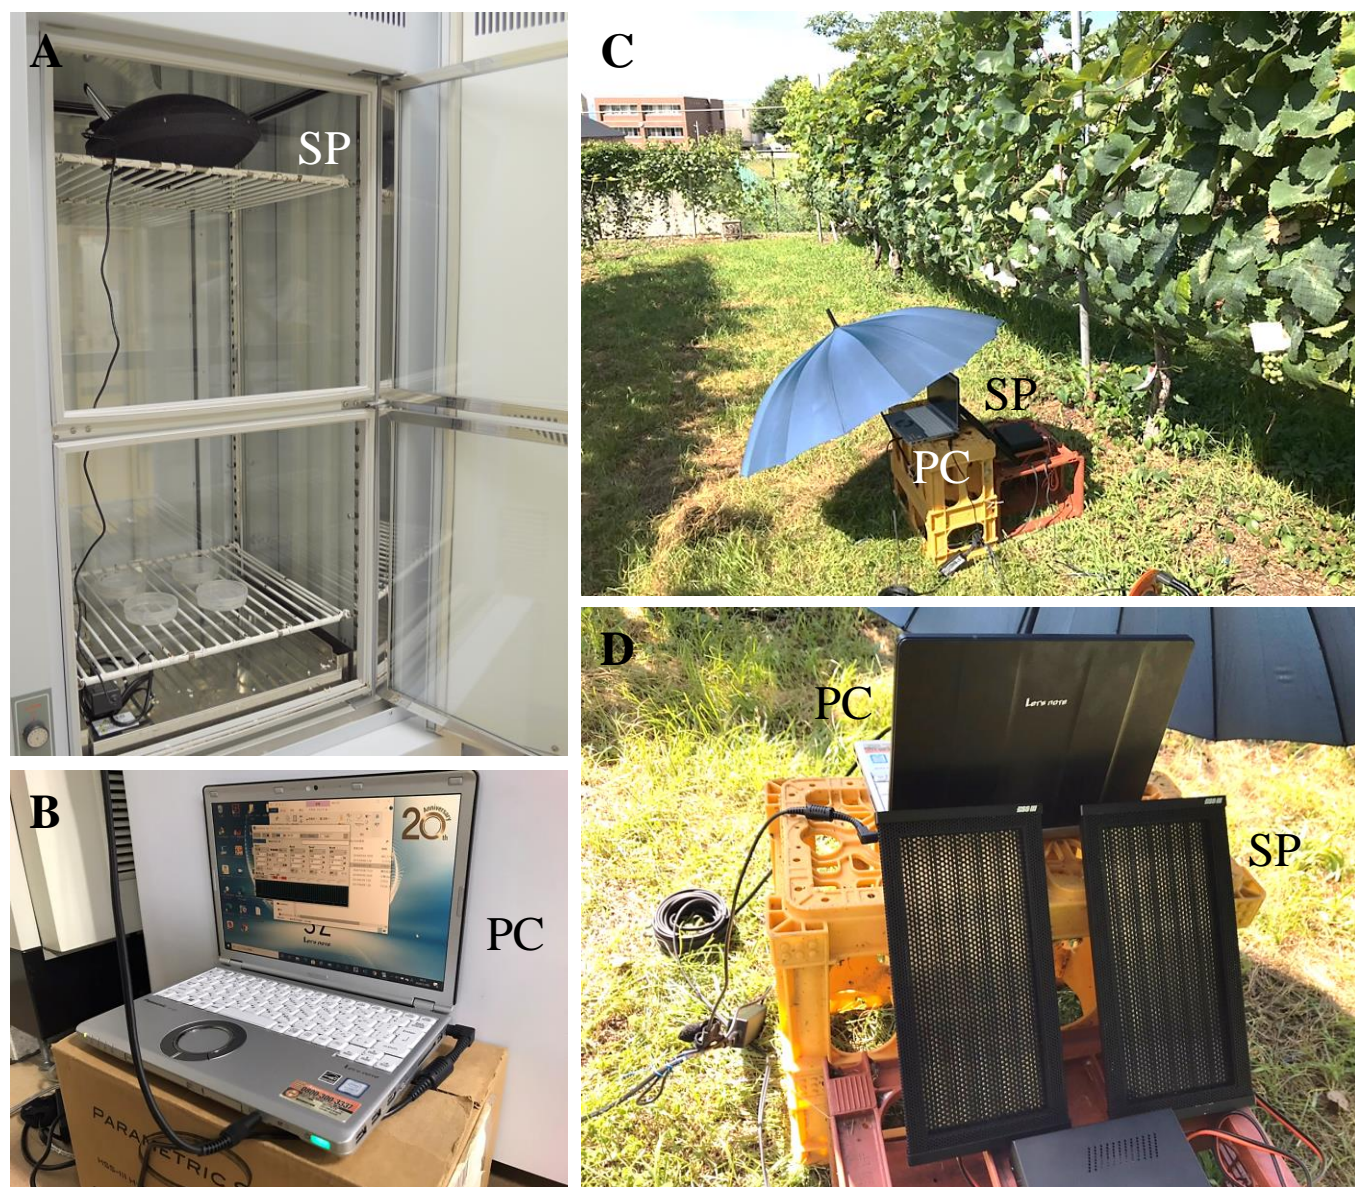

**Figure S1.** Experimental design of sound stimulation of grape cultured cells and field-grown grapevines. (A) Sound stimulation of VR cells. A speaker (SP) was placed in an incubator. Petri dishes containing VR cells were placed 70 cm below the speaker. (B) Sine wave sound at 1,000 Hz was produced using Wave Gene (<http://efu.jp.net/soft/wg/wg.html>) under a laptop computer (PC). (C) Sound stimulation of bunches on field-grown grapevine. Sound stimulation was performed at véraison (August 6, 2019). A speaker (SP) was placed approximately 70 cm away from bunches. (D) Sine wave sound at 1,000 Hz was produced using Wave Gene set under a laptop computer (PC).

```

-1608          CTCATCTTGCACATCCAATGATTGGTATGAATTCAACAGTACCTAATA -1561
-1560 GCACAATACTATAGAATTCTCCCTAAATTTATGAAAAAATTACATTTTTGTAAAGATCTAT -1501
-1500 CTAACCTCTGATTGAGCACACTCTAGAGCAACATTGAGACAACGCAGGCTGCAGCTTTT -1441
-1440 TCAACAATCTCAATTTTGCCCCAAAAATTTCCAAACATGGAAACCAGAAAATATTGTGAC -1381
-1380 TTGTTAAGGGCTTTTTTCGTCAATTCATCTTGGTTTTATTTGACATCATTTTTTTTTAAATT -1321
-1320 GTCTTTAAGAACAAAATTTATCTAGGAACATAAATATGAAAAACGATATTTTGGTCTTAT -1261
-1260 TCCACATGAGGGTGTTGTATAATTATATGCAATAAAAAAATTGTTGAAATATTTTTCATA -1201
-1200 TTTCAATTGTTATCTAAAATACTTTACAAAAAACGATTGAGAGCATATTAGACTTGGTC -1141
-1140 TTAAAAATAACTTGTTTTTAGAACACATTCTCAAAAAAATATTTTCTGTAAAAAATTTA -1081
-1080 GGGTCTGTTTGATAACTATTTTCTAAAACAGTTATAAAAAATAGTTTTTTTAAACTTTTC -1021
-1020 TCTAATGTTTTGTAAAACAAAATTTGTTTATAAATCTAAAATATTTTAACATATTTTTA -961
-960 ATATTTTTTTTAGTATATTTTAAAAATAAGTTTTATATCTAGTATTTTATTTTAAATCAT -901
-900 TCTACATATTTGTATAATTATTTTCAAATAACCATAAAAAACAGTTAAAAGAAATTT -841
-840 TCTGAAAATACCGTATTTTTTTTATCTAATAGTTTTTTATTGTTAAATATATTATCCTA -781
-780 GTTTTTTATTTTAAAGAATAGAAAACCATTCTCGGAAAATAAATACCAAATAGACTCTTA -721
-720 CTTTTTAAATTAATAACAGTTTTTGGGTCTTTTCAAAAAAGTTTTCAAACAAGTCCTT -661
-660 TAGTTTCTTTAATTATTTGCTTTTTCAAATCAATTCTTTAAAAATATTTTTTGAAAATA -601
-600 ATTCTTTAAATATTTTTCAATTGTTTTTGGTAACAAAATTCTATCTAATAACCAAAT -541
-540 ATAAAAAATATTTTTTTTAGTTCTCTTCATAAAAGTAATATATATCATGTGGAATACAAA -481
-480 AACTTTTAAACATTCTCTACCTTTTCAATATTACTAAAAAAAACAATTTTAAATTATTC -421
-420 TTAACAATGGGGTTTTAATCAAATTAATTTGAAACATTAAATTTATTTCAAAAAATT -361
-360 TATTGAATCATATTTTTCAAATTAGAAAACAATTTTATGTTGTTTAGAATAGAAAATTAT -301
-300 TTTTGAAGTAAAATTAACAAATATGCTCTTGCTACTACTCGCCAAGTATATCCACCAAT -241
-240 GGCAAAGTAAAAGCTCACACAGAGCTTTCACTTGCCCTGGTTTTGTTTTTTTTTCCCA -181
-180 TTTTTCTTTCTTTGGCCGCCATGCAGAATGGTGGTTTGGTTTTGGGTTGGTTTGTAGG -121
-120 AGGGTGGGAATTGGGATGACAACCCCCATGCAGTTGCCACTCTCACAACCCCCATGCAGT -61
-60 TGCTCTCATTTATAATCTTCAACAGCCAAAACCCAAATTGTAACATCCCCATTCCAACC -1

```

**Figure S2.** Nucleotide sequence of *UFGT* gene for promoter assay. A 1,608 bp promoter upstream of the translation start site (*V. vinifera* UDP-glucose: flavonoid 3-*O*-glucosyltransferase gene, promoter region, GenBank accession no. AY955269. Kobayashi et al., 2001) was used. Black shaded region is a highly conserved region among *Vitis* species. Boxed 8-bp sequence (ATTTCAAA) is the predicted ethylene-responsive element (Itzhaki et al., 1994).
